# Supplementary material for: Life cycle impact of nanosilver polymer-food storage containers as a case study informed by literature review
Source: Royal Society of Chemistry journal article supplement (doi:10.1039/c7en01043e), 2018-01-01
Supplement: c7en01043e1.pdf [file c7en01043e1.pdf]

1  
2  
3  
4  
5  
6  
7  
8  
9  
10  
11  
12  
13  
14  
15  
16  
17  
18  
19  
20  
21

**Life Cycle Impact of Nanosilver Polymers-Food Storage  
Containers as a Case Study**  
Supplemental Information

1 Table S1: LCA inventory data

2

|                           | Inputs                                                             | Outputs                              | Sima Pro Reference                                                                                                  | Database                       |
|---------------------------|--------------------------------------------------------------------|--------------------------------------|---------------------------------------------------------------------------------------------------------------------|--------------------------------|
| Nanosilver synthesis      | 1 kg of AgNP = 1.57 kg silver nitrate + 0.35 kg sodium borohydride |                                      | -                                                                                                                   |                                |
|                           | 1 kg silver nitrate                                                |                                      | -                                                                                                                   |                                |
|                           | 0.49 kg nitric acid                                                |                                      | Nitric acid, in water (60% HNO3), at plant/RER                                                                      | Agri                           |
|                           | 0.64 kg silver                                                     |                                      | Silver {GLO} market for                                                                                             | Ecoinvent 3                    |
|                           |                                                                    | 0.07 kg water                        | Water - Airborne emission                                                                                           |                                |
|                           |                                                                    | 0.06 kg Nitrogen monoxide            | Nitrogen oxide - Airborne emission                                                                                  |                                |
|                           | 1 kg sodium borohydride                                            |                                      | -                                                                                                                   |                                |
|                           | 2.74 kg trimethyl borate                                           |                                      | Trimethyl borate {GLO} market for                                                                                   | Ecoinvent 3                    |
|                           | 2.54 kg sodium hydride                                             |                                      | Not in SimaPro                                                                                                      |                                |
|                           | 0.958 kg Na + 0.042 kg H2 = 1 kg NaH                               |                                      | [Sodium {GLO} market for][Hydrogen (cracker) E]                                                                     | Ecoinvent 3, Industry Data 2.0 |
|                           | 13,915 kg Water                                                    |                                      | De-ionised water, reverse osmosis, production mix, at plant, from surface water RER System                          | Agri Footprint                 |
|                           | 0.024 m <sup>-3</sup> Water for cooling                            |                                      | Water, cooling, unspecified natural origin/m <sup>-3</sup> - Raw material                                           |                                |
|                           |                                                                    | 0.009 kg hydrogen                    | Hydrogen - Airborne emission                                                                                        |                                |
| nAg containers production |                                                                    | 0.13 kg diborane                     | Not in SimaPro - Created as Airborne emission                                                                       |                                |
|                           |                                                                    | 0.79 kg sodium nitrate               | Sodium nitrite -Waterborne emission                                                                                 |                                |
|                           | 64.35 g of plastic/container                                       |                                      | Polyethylene, high density, granulate {RER} production                                                              | Ecoinvent 3                    |
|                           | 64.35 µg of Ag / Container A                                       |                                      | Not in SimaPro                                                                                                      |                                |
| Usage phase               | 765.77 µg of Ag / Container B                                      |                                      | Not in SimaPro                                                                                                      |                                |
|                           | 820 cm <sup>-3</sup> of food/container                             |                                      | -                                                                                                                   |                                |
|                           |                                                                    | 1.27 µg of Ag / Container A          | Silver -Waterborne emission                                                                                         |                                |
| Washing of containers     |                                                                    | 15.16 µg of Ag / Container B         | Silver -Waterborne emission                                                                                         |                                |
|                           | 0.2 gallons of water/cycle*container                               |                                      | Drinking water, water purification treatment, production mix, at plant, from surface water RER S                    | ELCD                           |
|                           | 0.0625 kWh/cycle*container                                         |                                      | Electricity, at grid, US, 2010/kWh/RNA                                                                              | US LCI                         |
|                           | 1.2 g of detergent/cycle*container                                 |                                      | Soap {Row} production                                                                                               | Ecoinvent 3                    |
|                           |                                                                    | 0.2 gallons of water/cycle*container | Emission to water>water                                                                                             |                                |
|                           |                                                                    | 0.47 µg of Ag / Container A          | Waterborne emission                                                                                                 |                                |
|                           |                                                                    | 5.64 µg of Ag / Container B          | Waterborne emission                                                                                                 |                                |
| End of life               |                                                                    | 41.04 µg of Ag / Container A         | Inert Waste, for final disposal {RoW} treatment of inert waste, inert material landfill                             | Ecoinvent 3                    |
|                           |                                                                    | 488.35 µg of Ag / Container B        | Inert Waste, for final disposal {RoW} treatment of inert waste, inert material landfill                             | Ecoinvent 3                    |
|                           |                                                                    | 64.35 g of plastic/container         | waste polyethylene {row} treatment of waste polyethylene, waste polyethylene {row} treatment of waste polyethylene, | Ecoinvent 3                    |

3

4

5 Table S2: Environmental impact contributions for the three scenarios during raw materials and manufacturing  
6 phase.

| Impact category       | Unit         | No-Ag    | Low Ag   | High Ag  | % No-Ag | %Low Ag | %High Ag |
|-----------------------|--------------|----------|----------|----------|---------|---------|----------|
| Ozone depletion       | kg CFC-11 eq | 8.05E-11 | 8.62E-11 | 0.000    | 25.61%  | 27.40%  | 46.99%   |
| Global warming        | kg CO2 eq    | 0.124    | 0.124    | 0.125    | 33.29%  | 33.30%  | 33.40%   |
| Smog                  | kg O3 eq     | 0.005    | 0.005    | 0.005    | 33.19%  | 33.23%  | 33.58%   |
| Acidification         | kg SO2 eq    | 4.14E-04 | 4.14E-04 | 0.000    | 33.23%  | 33.25%  | 33.52%   |
| Eutrophication        | kg N eq      | 2.96E-05 | 3.04E-05 | 0.0000   | 29.77%  | 30.60%  | 39.64%   |
| Carcinogenics         | CTUh         | 3.99E-09 | 4.00E-09 | 4.08E-09 | 33.08%  | 33.14%  | 33.78%   |
| Non carcinogenics     | CTUh         | 1.98E-09 | 2.16E-09 | 4.15E-09 | 23.89%  | 26.08%  | 50.03%   |
| Respiratory effects   | kg PM2.5 eq  | 3.26E-05 | 3.27E-05 | 3.33E-05 | 33.10%  | 33.15%  | 33.75%   |
| Ecotoxicity           | CTUe         | 0.228    | 2.33E-01 | 2.78E-01 | 30.89%  | 31.46%  | 37.65%   |
| Fossil fuel depletion | MJ surplus   | 0.657    | 6.57E-01 | 6.57E-01 | 33.33%  | 33.33%  | 33.35%   |

7

8

9

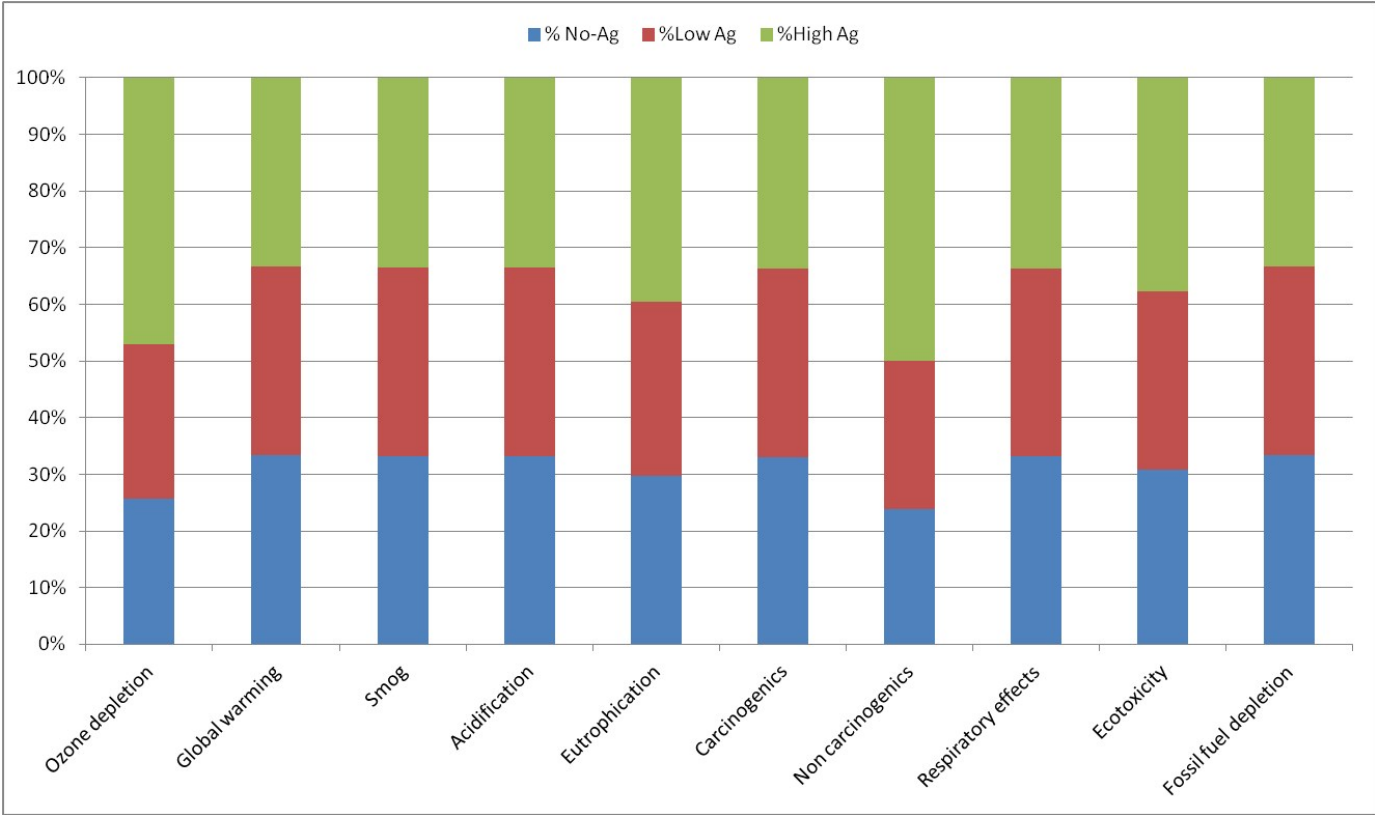

1

2 Figure S1: Environmental impact contributions for the three scenarios during raw materials and manufacturing  
3 phase.

4

5 Table S3: Non-carcinogenic environmental impact contributions of nanosilver and polymer for three scenarios  
6 during raw materials and manufacturing phase.

|            | No-Ag    | Low Ag   | High Ag  |
|------------|----------|----------|----------|
| Plastic    | 1.98E-09 | 1.98E-09 | 1.98E-09 |
| Nanosilver | 0.00E+00 | 1.82E-10 | 2.17E-09 |

7

8

9

10

11

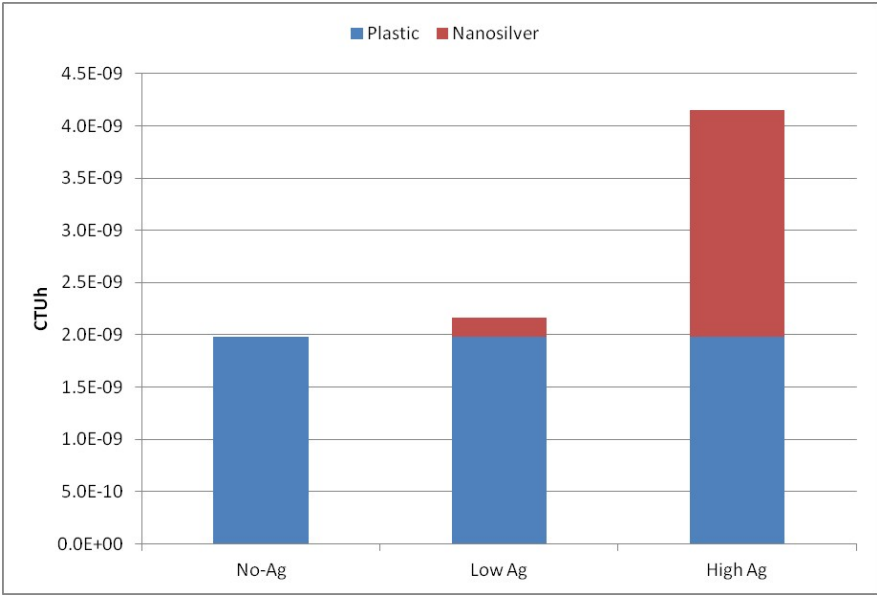

1

2 Figure S2: Non-carcinogenic environmental impact contributions of nanosilver and polymer for three scenarios  
3 during raw materials and manufacturing phase.

4 Table S4: Environmental impact contributions during washing phase of no-Ag container.

5

| Impact category       | Unit         | Soap     | Water    | Electricity | % Soap | %Water | % Electricity |
|-----------------------|--------------|----------|----------|-------------|--------|--------|---------------|
| Ozone depletion       | kg CFC-11 eq | 9.05E-09 | 5.43E-10 | 3.47E-11    | 94.00% | 5.64%  | 0.36%         |
| Global warming        | kg CO2 eq    | 1.93E-01 | 2.47E-02 | 2.15E+00    | 8.14%  | 1.04%  | 90.82%        |
| Smog                  | kg O3 eq     | 5.12E-03 | 8.13E-04 | 1.23E-01    | 3.96%  | 0.63%  | 95.41%        |
| Acidification         | kg SO2 eq    | 5.13E-04 | 6.61E-05 | 1.85E-02    | 2.69%  | 0.35%  | 96.97%        |
| Eutrophication        | kg N eq      | 6.33E-04 | 2.85E-05 | 2.50E-04    | 69.41% | 3.13%  | 27.47%        |
| Carcinogenics         | CTUh         | 4.36E-09 | 1.22E-10 | 4.36E-09    | 49.28% | 1.38%  | 49.34%        |
| Non carcinogenics     | CTUh         | 2.72E-08 | 1.83E-10 | 7.31E-08    | 27.06% | 0.18%  | 72.76%        |
| Respiratory effects   | kg PM2.5 eq  | 1.64E-04 | 2.23E-05 | 9.30E-04    | 14.68% | 2.00%  | 83.32%        |
| Ecotoxicity           | CTUe         | 8.33E-01 | 2.98E-03 | 1.06E+00    | 43.91% | 0.16%  | 55.93%        |
| Fossil fuel depletion | MJ surplus   | 5.24E-02 | 1.16E-02 | 1.87E+00    | 2.72%  | 0.60%  | 96.68%        |

6

7

8

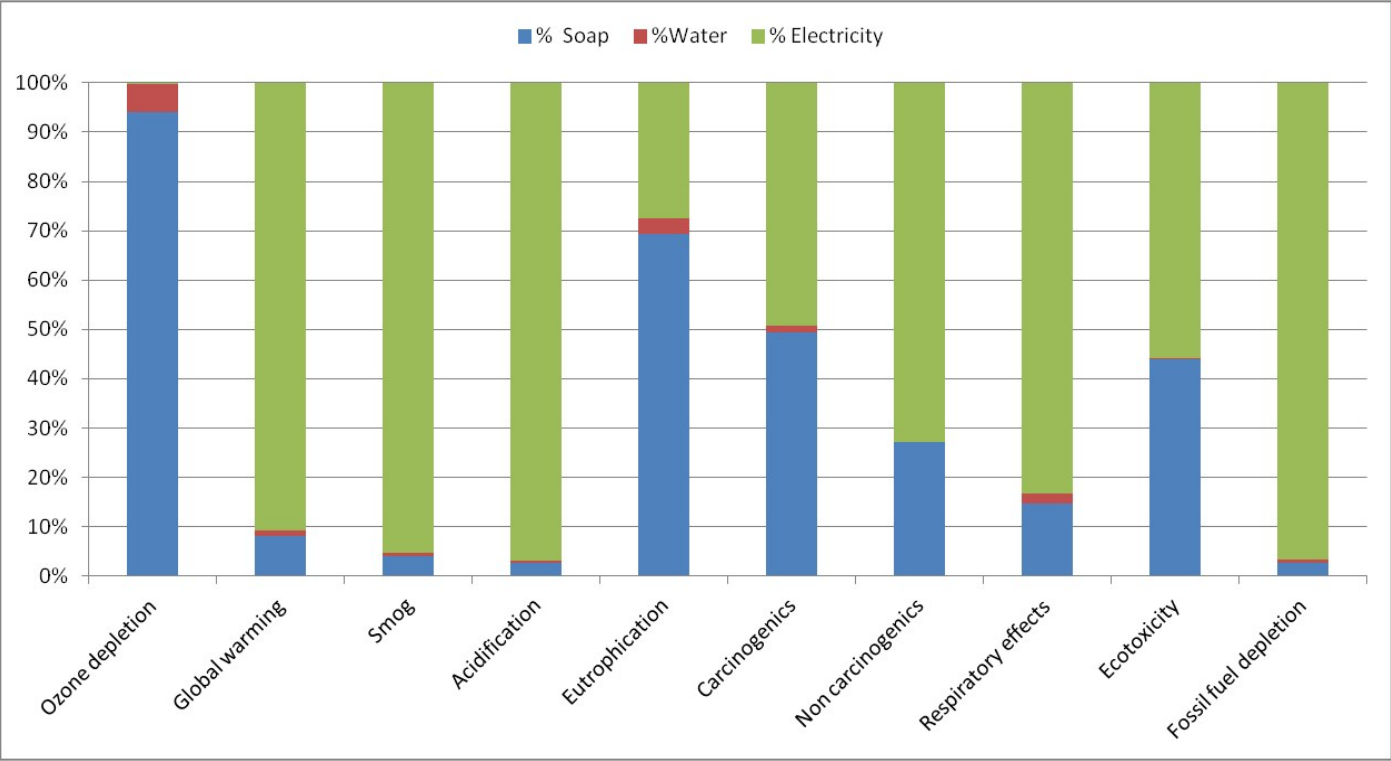

Figure S3: Environmental impact contributions during washing phase of no-Ag container.

Table S5: Non-carcinogenic environmental impact contributions of the three scenarios during all phases.

| Phase                           | No-Ag    | Low Ag   | High Ag  |
|---------------------------------|----------|----------|----------|
| Raw Materials and Manufacturing | 1.98E-09 | 2.16E-09 | 4.15E-09 |
| Usage                           | 0.00E+00 | 4.52E-13 | 5.38E-12 |
| Washing                         | 1.01E-07 | 1.01E-07 | 1.01E-07 |
| End of Life                     | 3.73E-08 | 3.73E-08 | 3.73E-08 |

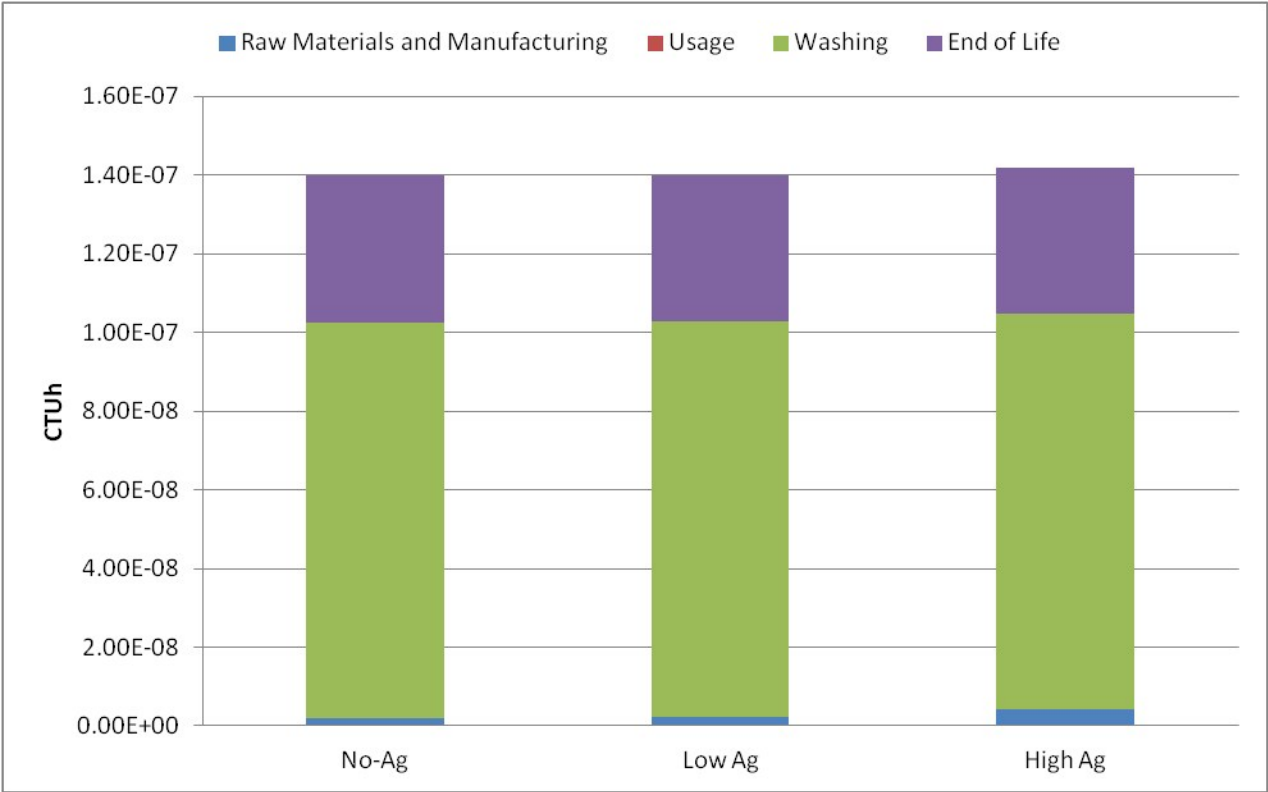

1

2 Figure S4: Non-carcinogenic environmental impact contributions of the three scenarios during all phases.

3

4 Table S6: Eutrophication environmental impact contributions of the three scenarios during all phases.

5

6

| Phase                           | No-Ag    | Low Ag   | High Ag  |
|---------------------------------|----------|----------|----------|
| Raw Materials and Manufacturing | 2.96E-05 | 3.04E-05 | 3.94E-05 |
| Usage                           | 0.00E+00 | 0.00E+00 | 0.00E+00 |
| Washing                         | 9.12E-04 | 9.12E-04 | 9.12E-04 |
| End of Life                     | 9.38E-04 | 9.38E-04 | 9.38E-04 |

7

8

9

10

11

12

13

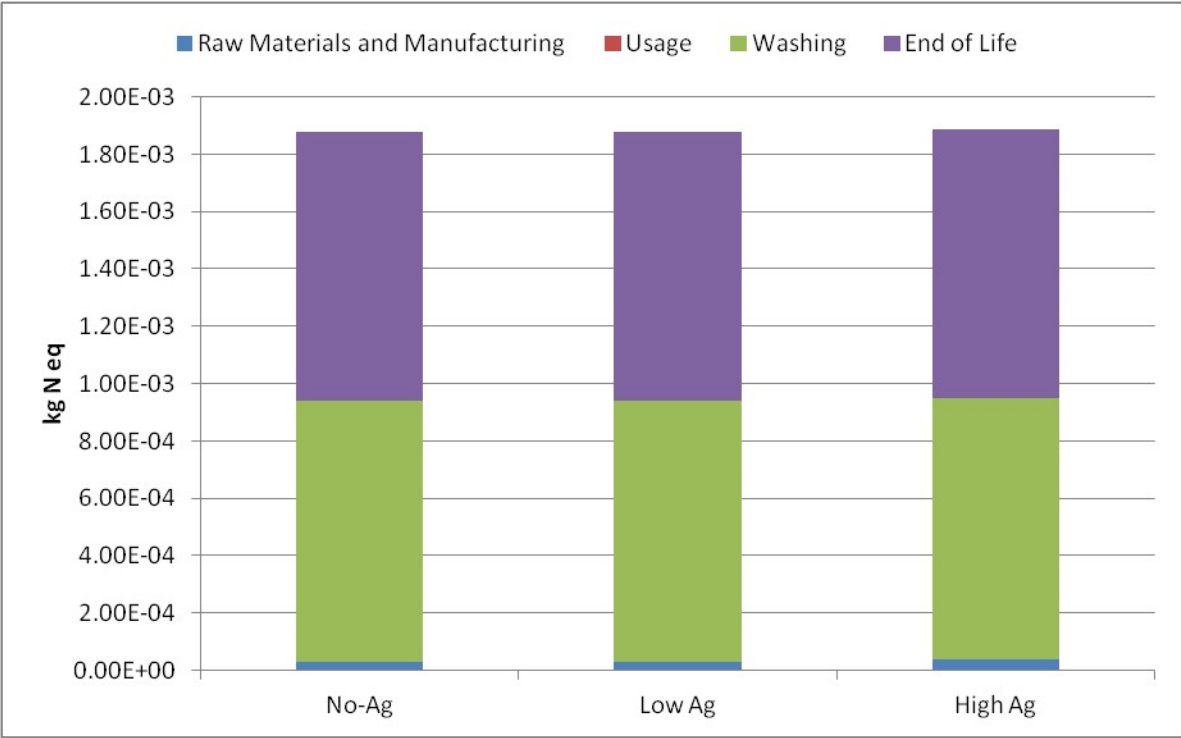

Figure S5: Eutrophication environmental impact contributions of the three scenarios during all phases.

Table S7: Smog environmental impact contributions of the three scenarios during all phases.

| Phase                           | No-Ag    | Low Ag   | High Ag  |
|---------------------------------|----------|----------|----------|
| Raw Materials and Manufacturing | 5.18E-03 | 5.19E-03 | 5.24E-03 |
| Usage                           | 0.00E+00 | 0.00E+00 | 0.00E+00 |
| Washing                         | 1.29E-01 | 1.29E-01 | 1.29E-01 |
| End of Life                     | 1.24E-04 | 1.24E-04 | 1.24E-04 |

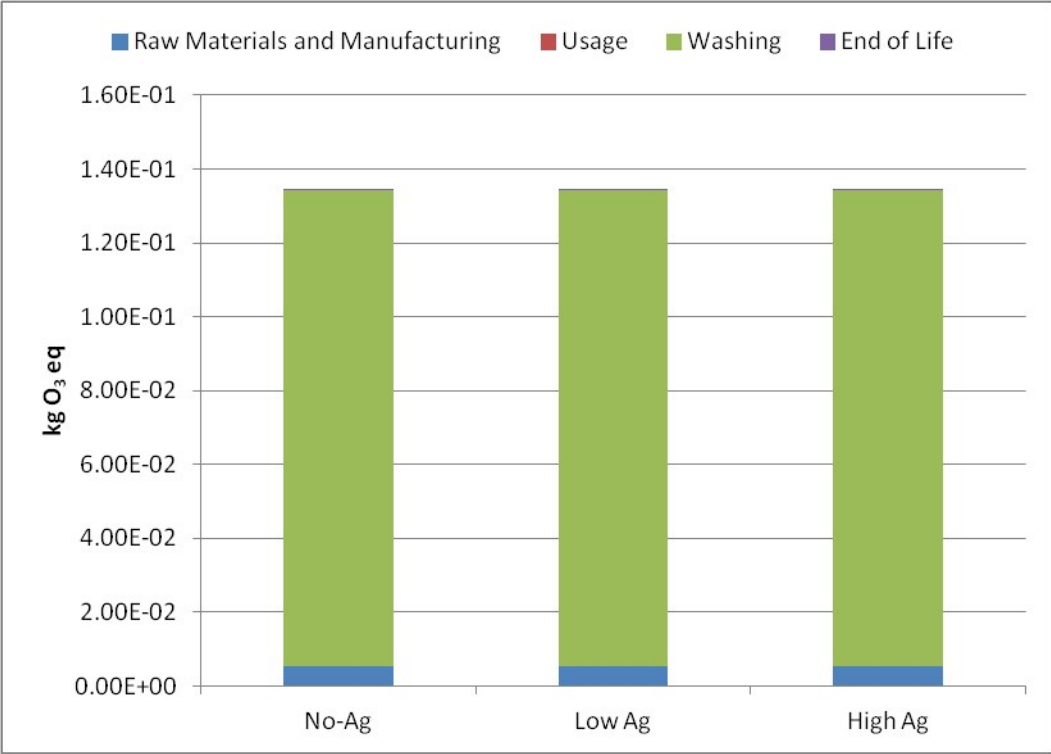

1

2 Figure S6: Smog environmental impact contributions of the three scenarios during all phases.

3 Table S8: Acidification environmental impact contributions of the three scenarios during all phases.

4

5

| Phase                           | No-Ag    | Low Ag   | High Ag  |
|---------------------------------|----------|----------|----------|
| Raw Materials and Manufacturing | 4.14E-04 | 4.14E-04 | 4.18E-04 |
| Usage                           | 0.00E+00 | 0.00E+00 | 0.00E+00 |
| Washing                         | 1.91E-02 | 1.91E-02 | 1.91E-02 |
| End of Life                     | 5.50E-06 | 5.50E-06 | 5.50E-06 |

6

7

8

9

10

11

12

13



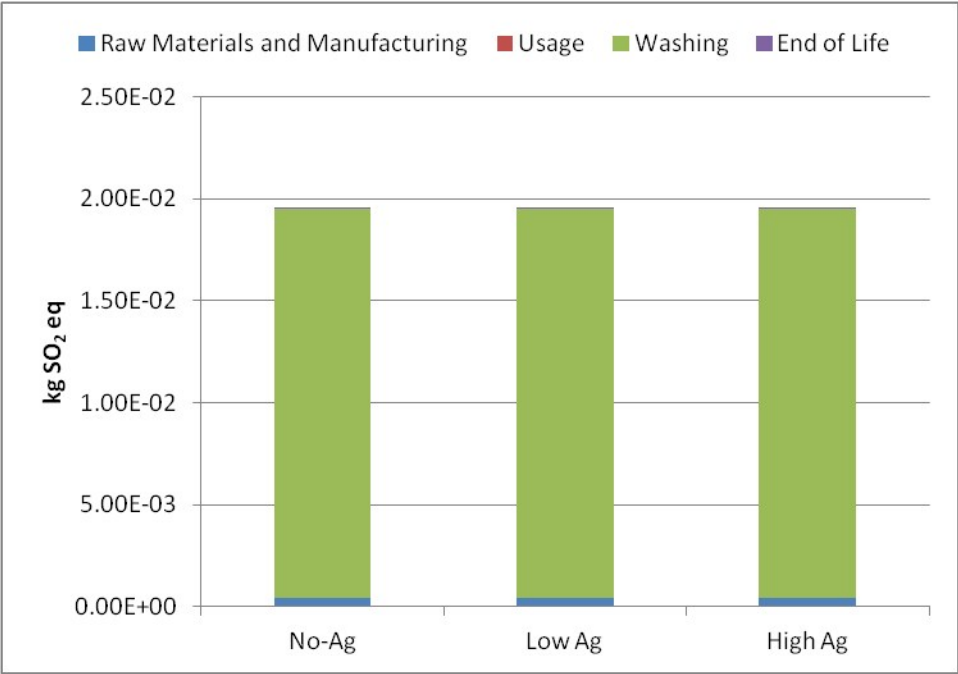

Figure S7: Acidification environmental impact contributions of the three scenarios during all phases.

Table S9: Carcinogenics environmental impact contributions of the three scenarios during all phases.

| Phase                           | No-Ag    | Low Ag   | High Ag  |
|---------------------------------|----------|----------|----------|
| Raw Materials and Manufacturing | 3.99E-09 | 4.00E-09 | 4.08E-09 |
| Usage                           | 0.00E+00 | 0.00E+00 | 0.00E+00 |
| Washing                         | 8.84E-09 | 8.84E-09 | 8.84E-09 |
| End of Life                     | 1.25E-10 | 1.25E-10 | 1.25E-10 |

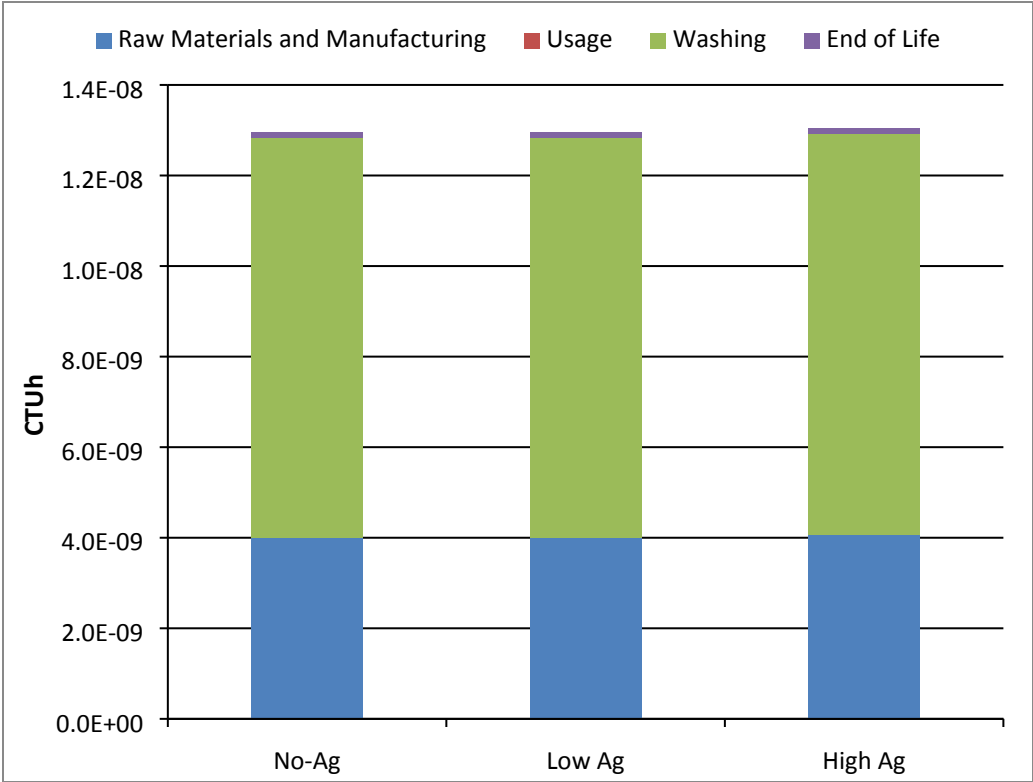

Figure S8: Carcinogenics environmental impact contributions of the three scenarios during all phases.

Table S10: Respiratory effects environmental impact contributions of the three scenarios during all phases

| Phase                           | No-Ag    | Low Ag   | High Ag  |
|---------------------------------|----------|----------|----------|
| Raw Materials and Manufacturing | 3.26E-05 | 3.27E-05 | 3.33E-05 |
| Usage                           | 0.00E+00 | 0.00E+00 | 0.00E+00 |
| Washing                         | 1.12E-03 | 1.12E-03 | 1.12E-03 |
| End of Life                     | 9.37E-07 | 9.37E-07 | 9.37E-07 |

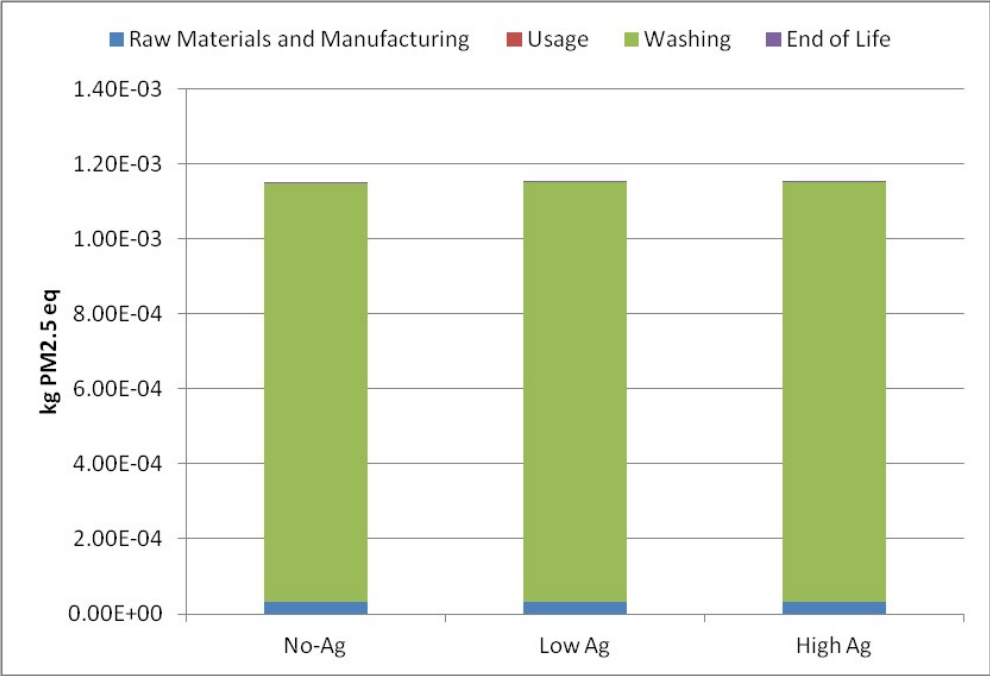

Figure S9: Respiratory effects environmental impact contributions of the three scenarios during all phases

Table S11: Fossil fuel depletion environmental impact contributions of the three scenarios during all phases

| Phase                           | No-Ag    | Low Ag   | High Ag  |
|---------------------------------|----------|----------|----------|
| Raw Materials and Manufacturing | 6.57E-01 | 6.57E-01 | 6.57E-01 |
| Usage                           | 0.00E+00 | 0.00E+00 | 0.00E+00 |
| Washing                         | 1.93E+00 | 1.93E+00 | 1.93E+00 |
| End of Life                     | 2.28E-03 | 2.28E-03 | 2.28E-03 |

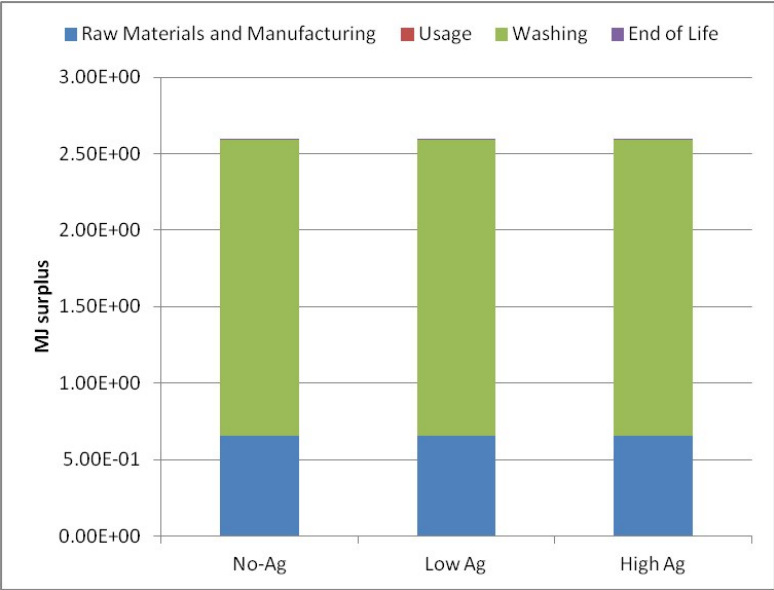

Figure S10: Fossil fuel depletion environmental impact contributions of the three scenarios during all phases

Table S12: Environmental impact contributions during washing phase of low-Ag container.

| Impact category       | Unit         | Nanosilver | Soap    | Water   | Electricity | % Nanosilver | % Soap | %Water | % Electricity |
|-----------------------|--------------|------------|---------|---------|-------------|--------------|--------|--------|---------------|
| Ozone depletion       | kg CFC-11 eq | 0.0E+00    | 9.0E-09 | 5.4E-10 | 3.5E-11     | 0.00%        | 94.00% | 5.64%  | 0.36%         |
| Global warming        | kg CO2 eq    | 0.0E+00    | 1.9E-01 | 2.5E-02 | 2.2E+00     | 0.00%        | 8.14%  | 1.04%  | 90.82%        |
| Smog                  | kg O3 eq     | 0.0E+00    | 5.1E-03 | 8.1E-04 | 1.2E-01     | 0.00%        | 3.96%  | 0.63%  | 95.41%        |
| Acidification         | kg SO2 eq    | 0.0E+00    | 5.1E-04 | 6.6E-05 | 1.9E-02     | 0.00%        | 2.69%  | 0.35%  | 96.97%        |
| Eutrophication        | kg N eq      | 0.0E+00    | 6.3E-04 | 2.9E-05 | 2.5E-04     | 0.00%        | 69.41% | 3.13%  | 27.47%        |
| Carcinogenics         | CTUh         | 0.0E+00    | 4.4E-09 | 1.2E-10 | 4.4E-09     | 0.00%        | 49.28% | 1.38%  | 49.34%        |
| Non carcinogenics     | CTUh         | 1.7E-13    | 2.7E-08 | 1.8E-10 | 7.3E-08     | 0.00%        | 27.06% | 0.18%  | 72.76%        |
| Respiratory effects   | kg PM2.5 eq  | 0.0E+00    | 1.6E-04 | 2.2E-05 | 9.3E-04     | 0.00%        | 14.68% | 2.00%  | 83.32%        |
| Ecotoxicity           | CTUe         | 9.1E-05    | 8.3E-01 | 3.0E-03 | 1.1E+00     | 0.00%        | 43.91% | 0.16%  | 55.93%        |
| Fossil fuel depletion | MJ surplus   | 0.0E+00    | 5.2E-02 | 1.2E-02 | 1.9E+00     | 0.00%        | 2.72%  | 0.60%  | 96.68%        |

Table S13: Environmental impact contributions during washing phase of high-Ag container.

| Impact category       | Unit         | Nanosilver | Soap    | Water   | Electricity | % Nanosilver | % Soap | %Water | % Electricity |
|-----------------------|--------------|------------|---------|---------|-------------|--------------|--------|--------|---------------|
| Ozone depletion       | kg CFC-11 eq | 0.0E+00    | 9.0E-09 | 5.4E-10 | 3.5E-11     | 0.00%        | 94.00% | 5.64%  | 0.36%         |
| Global warming        | kg CO2 eq    | 0.0E+00    | 1.9E-01 | 2.5E-02 | 2.2E+00     | 0.00%        | 8.14%  | 1.04%  | 90.82%        |
| Smog                  | kg O3 eq     | 0.0E+00    | 5.1E-03 | 8.1E-04 | 1.2E-01     | 0.00%        | 3.96%  | 0.63%  | 95.41%        |
| Acidification         | kg SO2 eq    | 0.0E+00    | 5.1E-04 | 6.6E-05 | 1.9E-02     | 0.00%        | 2.69%  | 0.35%  | 96.97%        |
| Eutrophication        | kg N eq      | 0.0E+00    | 6.3E-04 | 2.9E-05 | 2.5E-04     | 0.00%        | 69.41% | 3.13%  | 27.47%        |
| Carcinogenics         | CTUh         | 0.0E+00    | 4.4E-09 | 1.2E-10 | 4.4E-09     | 0.00%        | 49.28% | 1.38%  | 49.34%        |
| Non carcinogenics     | CTUh         | 2.0E-12    | 2.7E-08 | 1.8E-10 | 7.3E-08     | 0.00%        | 27.05% | 0.18%  | 72.76%        |
| Respiratory effects   | kg PM2.5 eq  | 0.0E+00    | 1.6E-04 | 2.2E-05 | 9.3E-04     | 0.00%        | 14.68% | 2.00%  | 83.32%        |
| Ecotoxicity           | CTUe         | 1.1E-03    | 8.3E-01 | 3.0E-03 | 1.1E+00     | 0.06%        | 43.88% | 0.16%  | 55.90%        |
| Fossil fuel depletion | MJ surplus   | 0.0E+00    | 5.2E-02 | 1.2E-02 | 1.9E+00     | 0.00%        | 2.72%  | 0.60%  | 96.68%        |

1

2 Table S14: Sensitivity analysis for the conventional container scenario. Reduction of 25% of the parameters.

| -25%                  |     |         |       |             |           |
|-----------------------|-----|---------|-------|-------------|-----------|
| Impact category       | nAg | Plastic | Water | Electricity | Detergent |
| Ozone depletion       | -   | -0.2%   | -1.4% | -0.1%       | -22.8%    |
| Global warming        | -   | -1.2%   | -0.2% | -21.5%      | -1.9%     |
| Smog                  | -   | -1.0%   | -0.2% | -22.9%      | -1.0%     |
| Acidification         | -   | -0.5%   | -0.1% | -23.7%      | -0.7%     |
| Eutrophication        | -   | -0.4%   | -0.4% | -3.3%       | -8.4%     |
| Carcinogenics         | -   | -7.7%   | -0.2% | -8.41%      | -8.40%    |
| Non carcinogenics     | -   | -0.4%   | 0.0%  | -13.1%      | -4.9%     |
| Respiratory effects   | -   | -0.7%   | -0.5% | -20.2%      | -3.6%     |
| Ecotoxicity           | -   | -0.7%   | 0.0%  | -3.4%       | -2.7%     |
| Fossil fuel depletion | -   | -6.3%   | -0.1% | -18.0%      | -0.5%     |

3

4

5 Table S15: Sensitivity analysis for the low-nAg content container scenario. Reduction of 25% of the  
6 parameters.

| Impact category       | nAg      | Plastic | Water | Electricity | Detergent |
|-----------------------|----------|---------|-------|-------------|-----------|
| Ozone depletion       | -0.0142% | -0.2%   | -1.4% | -0.1%       | -22.7%    |
| Global warming        | -0.0003% | -1.2%   | -0.2% | -21.5%      | -1.9%     |
| Smog                  | -0.0009% | -1.0%   | -0.2% | -22.9%      | -1.0%     |
| Acidification         | -0.0004% | -0.5%   | -0.1% | -23.7%      | -0.7%     |
| Eutrophication        | -0.0110% | -0.4%   | -0.4% | -3.3%       | -8.4%     |
| Carcinogenics         | -0.0137% | -7.7%   | -0.2% | -8.4%       | -8.4%     |
| Non carcinogenics     | -0.0325% | -0.4%   | 0.0%  | -13.1%      | -4.9%     |
| Respiratory effects   | -0.0012% | -0.7%   | -0.5% | -20.2%      | -3.6%     |
| Ecotoxicity           | -0.0136% | -0.7%   | 0.0%  | -3.4%       | -2.7%     |
| Fossil fuel depletion | -0.0003% | -6.3%   | -0.1% | -18.0%      | -0.5%     |

7

8

9

10

11

12

13

1 Table S16: Sensitivity analysis for the high-nAg content container scenario. Reduction of 25% of the  
2 parameters.

| Impact category       | nAg     | Plastic | Water | Electricity | Detergent |
|-----------------------|---------|---------|-------|-------------|-----------|
| Ozone depletion       | -0.168% | -0.2%   | -1.4% | -0.1%       | -22.6%    |
| Global warming        | -0.004% | -1.2%   | -0.2% | -21.5%      | -1.9%     |
| Smog                  | -0.011% | -1.0%   | -0.2% | -22.9%      | -1.0%     |
| Acidification         | -0.005% | -0.5%   | -0.1% | -23.7%      | -0.7%     |
| Eutrophication        | -0.130% | -0.4%   | -0.4% | -3.3%       | -8.4%     |
| Carcinogenics         | -0.162% | -7.7%   | -0.2% | -8.4%       | -8.3%     |
| Non carcinogenics     | -0.382% | -0.3%   | 0.0%  | -12.9%      | -4.8%     |
| Respiratory effects   | -0.014% | -0.7%   | -0.5% | -20.2%      | -3.6%     |
| Ecotoxicity           | -0.161% | -0.7%   | 0.0%  | -3.4%       | -2.7%     |
| Fossil fuel depletion | -0.004% | -6.3%   | -0.1% | -18.0%      | -0.5%     |

3  
4  
5  
6  
7  
8  
9  
10  
11  
12  
13  
14  
15  
16  
17

The Ag losses were calculated utilizing data from experimental studies, as detailed in the article. Equations 1 and 2 were utilized independently to calculate the Ag losses from the initial Ag concentration as a function of losses due to washing and food storage. The remaining Ag in the container at the end of its life, was calculated by subtracting the Ag losses from the initial Ag content of the container.
